# Supplementary material
Source: PubMed Central journal article supplement (PMC4433859)
Supplement: NIHMS671655-supplement-1.pdf [file NIHMS671655-supplement-1.pdf]

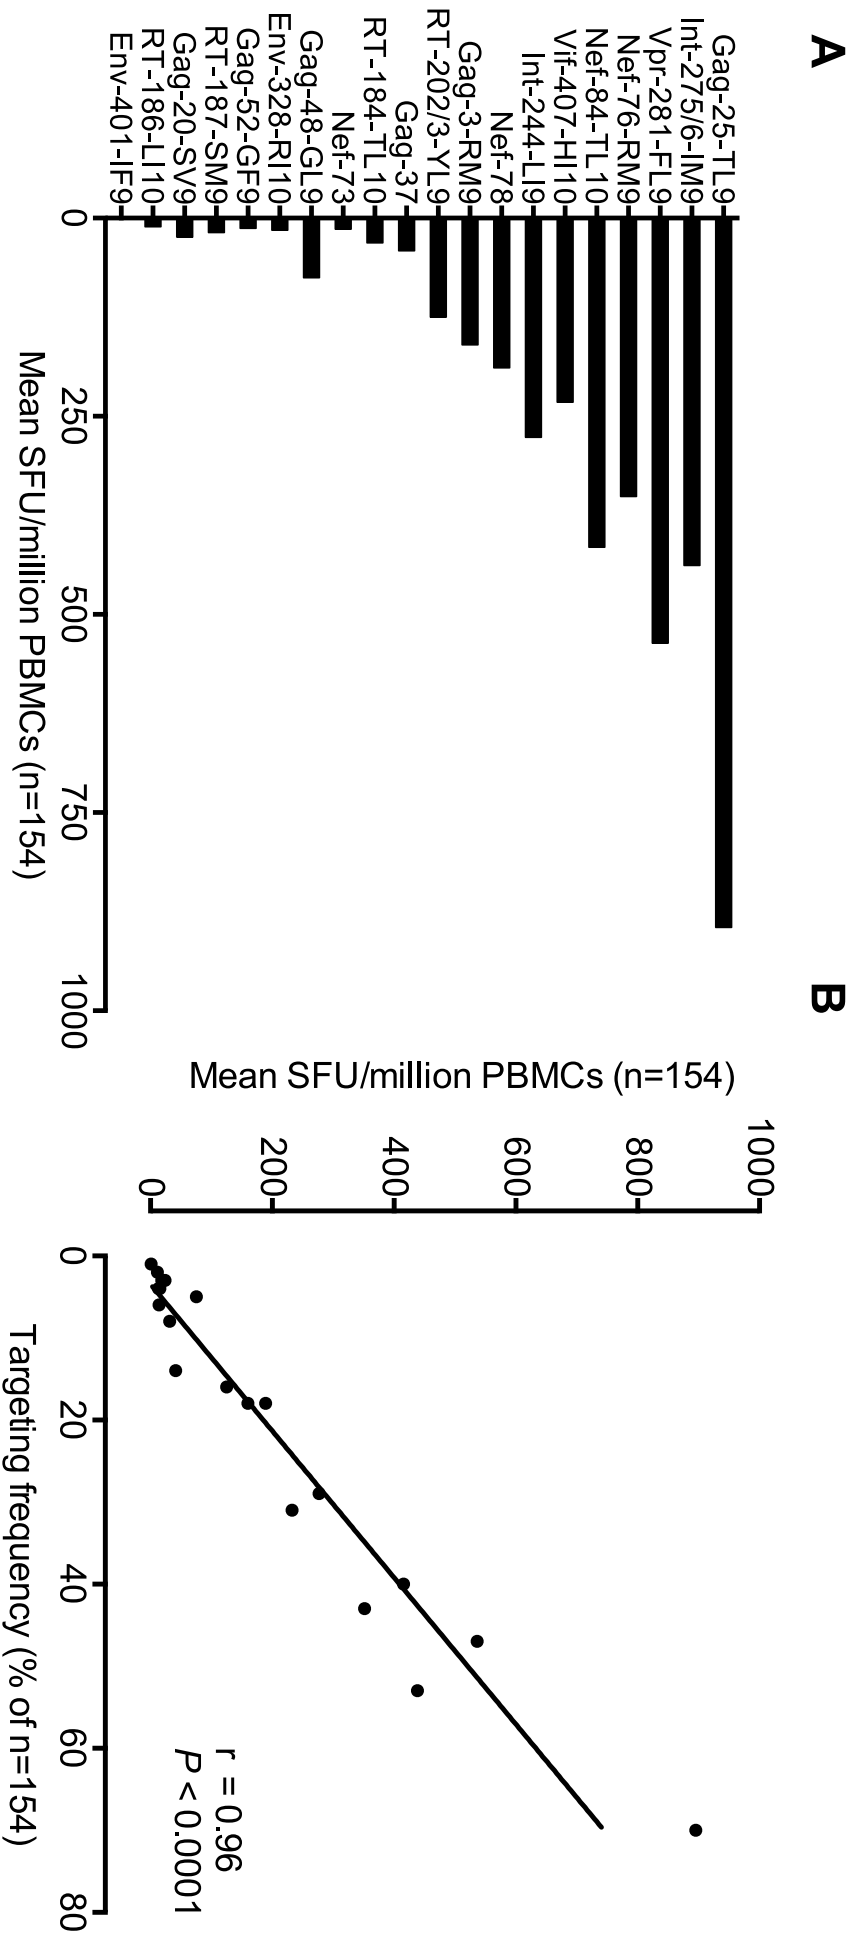

**Figure S1. Magnitude of HLA-B\*42:01-restricted CD8+ T-cell responses.** (A) Magnitude of HLA-B42:01-restricted CD8+ T-cell responses directed against 'protein-18mer peptide-optimal epitope name' OLPs in *ex vivo* IFN $\gamma$  assays for HLA-B\*42:01+ individuals lacking HLA-B\*07:02/39:10/42:02/81:01 co-expression (n = 154). (B) Correlation between CD8+ T-cell response magnitude and % targeting frequency.

Fig S1

Fig S2

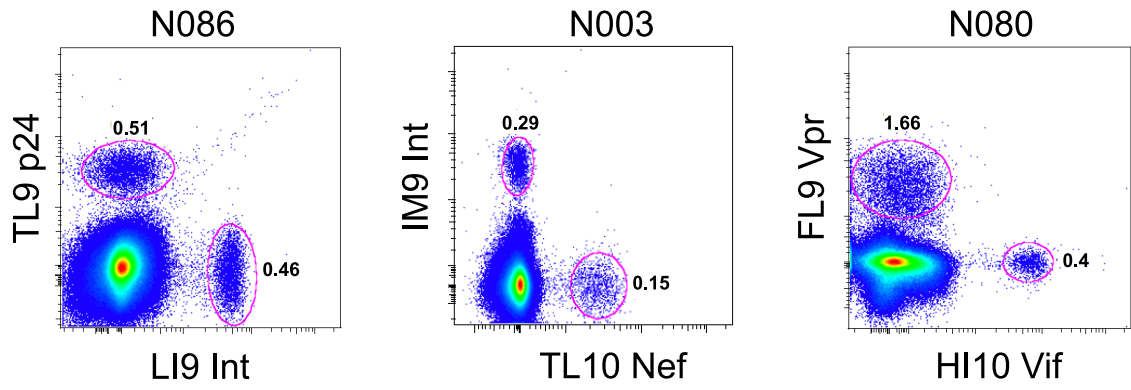

**Figure S2. HLA-B\*42:01 tetramer staining of epitope-specific CD8<sup>+</sup> T-cell populations for TCR sequencing.** Six different HLA-B\*42:01 tetramers were used to sort six different HLA-B\*42:01-restricted CD8<sup>+</sup> T-cell populations as depicted. Representative dual stains are shown for three different donors. Plots are gated on live CD3<sup>+</sup> CD8<sup>+</sup> events.

**Table S1. Peptide-HLA-B\*42:01 binding affinity and stability.**

| Epitope  | Sequence                 | Binding score<br>K <sub>D</sub> (nM) <sup>b</sup> | Binding half-life<br>(hrs) <sup>c</sup> |
|----------|--------------------------|---------------------------------------------------|-----------------------------------------|
| Gag-RM9  | RPGGKKHYM <sup>a</sup>   | 7.0                                               | 6.2                                     |
| Gag-SV9  | SPRTLNAWV <sup>a</sup>   | 2.0                                               | 2.0                                     |
| Gag-TL9  | TPQDLNTML                | 82.0                                              | 3.6                                     |
| Gag-GL9  | GPSHKARVL                | 24.0                                              | 1.9                                     |
| Gag-GF9  | GPKRIVKCF <sup>a</sup>   | 8.0                                               | 11.0                                    |
| RT-LI11  | LPQGWKGSPAI <sup>a</sup> | 15.0                                              | 1.1                                     |
| RT-SM9   | SPAIFQSSM <sup>a</sup>   | 3.0                                               | 12.0                                    |
| RT-YL9   | YPGIKVRQL <sup>a</sup>   | 3.0                                               | 6.2                                     |
| Int-LI9  | LPPIVAKEI                | 7.0                                               | 5.0                                     |
| Int-IM9  | I IKDYGKQM <sup>a</sup>  | 19.0                                              | 13.5                                    |
| Nef-RM9  | RPQVPLRPM                | 3.0                                               | 22.4                                    |
| Nef-TL10 | TPGPGVRYPL               | 1.0                                               | 14.3                                    |
| Vpr-FL9  | FPRPWLHGL                | 1.0                                               | 11.6                                    |
| Vif-HI10 | HPKVSSEVHI <sup>a</sup>  | 38.0                                              | 17.1                                    |
| Env-RI10 | RPNNNTRKSI <sup>a</sup>  | 9.0                                               | 13.2                                    |
| Env-IF9  | I PRRIRQGF <sup>a</sup>  | 23.0                                              | 7.3                                     |

<sup>a</sup> Novel HLA-B\*42:01-restricted epitopes.

<sup>b</sup> Mean of two experiments.

<sup>c</sup> Mean of two experiments.

**Table S2. Clonal analysis of HLA-B\*42:01-restricted Gag-RM9-specific CD8<sup>+</sup> T-cell populations.**

| Subject (ddmmyy)       | Epitope | CD8 <sup>+</sup> |      | CD4 | TRBV | CDR3          | TRBJ  | Freq (%) |
|------------------------|---------|------------------|------|-----|------|---------------|-------|----------|
|                        |         | Tet <sup>+</sup> | pVL  |     |      |               |       |          |
| R014 (130907)          | RM9     | 0.2              | 1177 | 300 | 10-3 | CAISGGEYNQPQH | 1-5   | 98.5     |
| HLA-A*30:01/33:01      |         |                  |      |     | 2    | CASSDKAGTDTQY | 2-3   | 1.5      |
| HLA-B*42:01/57:03      |         |                  |      |     |      |               | count | (65)     |
| HLA-C*17:01/18:01      |         |                  |      |     |      |               |       |          |
| Number of cells sorted | 428     |                  |      |     |      |               |       |          |

Columns show: HLA genotyping data below the subject identifier with sample date in brackets; targeted epitope; frequency of tetramer<sup>+</sup> (Tet<sup>+</sup>) cells in the total CD8<sup>+</sup> T-cell population; plasma viral load (pVL, HIV RNA copies/ml of plasma); CD4<sup>+</sup> T-cell count (CD4, cells/μl blood); TRBV usage; CDR3 amino acid sequence; TRBJ usage; clonotype frequency (%).
